# Supplementary material
Source: publisher figshare collection journal article supplement (https://geolsoc.figshare.com/ndownloader/files/36235977)
Supplement: Supplementary file 1 [file 36235977]

## Sheet: Sheet2
Sample	Reference	South	West	Source	Analysis	Method	Age	Error	MSWD	87Sr/86Sri	εNdi	206Pb/204Pbi	207Pb/204Pbi	208Pb/204Pbi
15JB45		-64.7696	-64.0903	This study	U-Pb zircon	LA-ICP-MS	132	1	0.63	0.704049	4.60067	18.5134	15.6069	38.3618
15JB53		-64.8251	-62.8574	This study	U-Pb zircon	LA-ICP-MS	104	1	1.29	0.704962	0.718478	18.6953	15.6415	38.5523
PRR-6061	15JB62	-64.8833	-62.55	This study	U-Pb zircon	LA-ICP-MS	112	1	1.72	0.705444	-0.231647	18.9319	15.6606	38.5968
PRR-6031	15JB64	-65.25	-64.0833	This study	U-Pb zircon	LA-ICP-MS	112	1	1.66	0.704141	0.933034	18.836	15.6491	38.7122
PRR-6000	15JB65	-67.8167	-67.1833	This study	U-Pb zircon	LA-ICP-MS	106	1	3.3	0.705159	-0.413544	18.8021	15.6513	38.5955
PRR-24285	15JB67	-63.2167	-62.25	This study	U-Pb zircon	LA-ICP-MS	137	1	3.89	0.705282	2.31848	18.8197	15.6523	38.6793
PRR-24201	15JB69	-63.2167	-62.25	This study	U-Pb zircon	LA-ICP-MS	137	1	4.54
PRR-5990	15JB76	-64.5667	-61.55	This study	U-Pb zircon	LA-ICP-MS	119	1	4.8	0.709001	-0.309514	18.8336	15.6586	38.6581
PRR-5991	15JB77	-64.5667	-61.55	This study	U-Pb zircon	LA-ICP-MS	119	1	4.4
PRR-6034	15JB79	-65.2833	-64.1	This study	U-Pb zircon	LA-ICP-MS	81	1	0.98	0.704391	-1.28094	18.3819	15.6022	38.3646
PRR-5994	15JB80	-68.1333	-67.1167	This study	U-Pb zircon	LA-ICP-MS	112	1	2.92
PRR-5992	15JB82	-68.1333	-67.1167	This study	U-Pb zircon	LA-ICP-MS	112	1	2.37	0.706081	-5.73135	18.3119	15.6319	38.4509
PRR-5998	15JB83	-67.8167	-67.1833	This study	U-Pb zircon	LA-ICP-MS	105	1	1.27
PRR-5999	15JB84	-67.8167	-67.1833	This study	U-Pb zircon	LA-ICP-MS	105	1	2.36
PRR-5985	15JB86	-64.9	-63.05	This study	U-Pb zircon	LA-ICP-MS	135	1	4.69	0.725523	-10.5831	18.1053	15.6321	38.6655
PRR-32819	15JB88	-62.7167	-60.3667	This study	U-Pb zircon	LA-ICP-MS	191	1	2.84
PRR-6023	16JB62	-65.2	-64.1	This study	U-Pb zircon	LA-ICP-MS	105	1	2.08
PRR-6025	16JB63	-65.2	-64.1	This study	U-Pb zircon	LA-ICP-MS	101	1	2.37	0.704925	1.25126	18.6275	15.6257	38.473
PRR-24226	16JB77	-62.7333	-61.2	This study	U-Pb zircon	LA-ICP-MS	116	1	2.79	0.7049	1.87447	18.6293	15.6359	38.4847
N11.8.1	18JB06	-71.4982	-63.0104	This study	U-Pb zircon	LA-ICP-MS	113	1	3.17	0.709988	-9.67244	18.7306	15.6619	38.4732
N11.142.1	18JB08	-71.4175	-63.5814	This study	U-Pb zircon	LA-ICP-MS	126	1	1.95	0.705636	-0.819663	19.0012	15.6687	38.5742
J6.307.1	18JB09	-67.4663	-68.5346	This study	U-Pb zircon	LA-ICP-MS	101	1	8.27
J6.290.1	18JB10	-67.5972	-68.7449	This study	U-Pb zircon	LA-ICP-MS	112	1	2.52	0.705006	-0.909236	18.6532	15.6412	38.5242
J6.386.1	18JB12	-67.2714	-68.1942	This study	U-Pb zircon	LA-ICP-MS	118	1	10.9
N11.12.1	18JB14	-71.7272	-62.5239	This study	U-Pb zircon	LA-ICP-MS	116	1	1.86
N11.15.1	18JB15	-71.7248	-62.5673	This study	U-Pb zircon	LA-ICP-MS	117	1	2.2	0.705313	-0.798907	18.6219	15.6359	38.0571
R5939.2	18JB17	-70.222	-66.6779	This study	U-Pb zircon	LA-ICP-MS	117	1	0.92	0.705975	-2.11042	18.6189	15.6474	38.4598
R5979.1	18JB21	-70.9316	-66.2556	This study	U-Pb zircon	LA-ICP-MS	115	1	2.74	0.706836	-2.60749	18.7829	15.6618	38.6021
R5793.2	18JB23	-70.9367	-66.8033	This study	U-Pb zircon	LA-ICP-MS	79	1	2.76	0.706835	-1.88803	18.8154	15.6586	38.6463
R5905.4	18JB24	-71.2797	-66.1322	This study	U-Pb zircon	LA-ICP-MS	92	1	1.75	0.705987	-0.800025	18.7778	15.6496	38.6035
J6.297.1	18JB28	-67.6278	-68.7542	This study	U-Pb zircon	LA-ICP-MS	106	1	1.69	0.705181	0.571029	18.6998	15.6409	38.5501
R6317.1	18JB30	-71.506	-67.1154	This study	U-Pb zircon	LA-ICP-MS	136	1	3.26	0.707953	-4.85675	18.7561	15.6613	38.5942
R5297.1	18JB31	-70.6333	-67.15	This study	U-Pb zircon	LA-ICP-MS	139	1	6.33	0.706176	-0.434736	18.6697	15.6568	38.5743
R6057.3	18JB36	-70.3914	-67.9228	This study	U-Pb zircon	LA-ICP-MS	139	1	1.64	0.704636	4.05449	18.5714	15.6257	38.3814
N11.3.1	18JB55	-71.5645	-62.8213	This study	U-Pb zircon	LA-ICP-MS	112	1	1.55	0.705733	-3.13076	18.8046	15.6578	38.6181
P14.03.1	18JB67	-74.3241	-64.6307	This study	U-Pb zircon	LA-ICP-MS	114	1	3.45	0.705295	-2.74957	18.8486	15.646	38.6657
15JB59_25				Bastias et al. (2019)	Ar/Ar whole rock		137.4	0.7	3.7
AA0815				Bastias et al. (2019)	U-Pb zircon	SHRIMP	153.1	1.7	1.6
AA1103-09				Bastias et al. (2019)	U-Pb zircon	SHRIMP	137.1	1.7	2.1
AASW-P1				Bastias et al. (2019)	U-Pb zircon	SHRIMP	109	1.4	1.7
18JB02	R.6067.8	-70.6942	-66.5839	Bastias et al. (2020a)	U-Pb zircon	LA-ICP-MS	207.6	2.5	1.06	0.714047	-3.43014	18.6527	15.6783	38.5076
18JB03	K7.557.1	-68.1084	-65.0242	Bastias et al. (2020a)	U-Pb zircon	LA-ICP-MS	223	1.8	0.86	0.70761	-4.72284	18.8045	15.6765	38.2973
18JB18	R.6306.7	-71.6131	-66.3454	Bastias et al. (2020a)	U-Pb zircon	LA-ICP-MS	212.4	1.5	1.30	0.706119	-6.22277	18.7937	15.6737	38.5383
18JB20	R.5786.3	-70.9158	-66.9183	Bastias et al. (2020a)	U-Pb zircon	LA-ICP-MS	203.3	0.6	1.00	0.707185	-4.00534	19.0088	15.6792	38.5463
18JB27	R.5290.1	-70.5333	-66.8	Bastias et al. (2020a)	U-Pb zircon	LA-ICP-MS	216.2	2	1.60
18JB34	K7.526.3	-68.2005	-65.1823	Bastias et al. (2020a)	U-Pb zircon	LA-ICP-MS	215.2	1.8	1.12	0.709161	-3.329	18.63	15.6782	38.0601
18JB43	K7.562	-68.187	-65.3047	Bastias et al. (2020a)	U-Pb zircon	LA-ICP-MS	217.3	0.5	1.05	0.709661	-3.68225	18.6218	15.6716	38.1352
15JB72	PRR-5983	-63.55	-58.9333	Bastias et al. (2021a)	U-Pb zircon	LA-ICP-MS	162.92	0.87	0.9
15JB73	PRR-6037	-68.1833	-67	Bastias et al. (2021a)	U-Pb zircon	LA-ICP-MS	155.73	0.43	1.3	0.708371	-2.56505	18.8633	15.6642	38.5938
16JB69	PRR-32977	-63.4158	-57.0111	Bastias et al. (2021a)	U-Pb zircon	LA-ICP-MS	159.65	0.27	1.08	0.707411	-4.06143	18.7094	15.6609	38.5716
16JB70	PRR-6230	-65.4333	-65.4833	Bastias et al. (2021a)	U-Pb zircon	LA-ICP-MS	150.8	0.34	0.9	0.704448	3.8489	18.3964	15.6134	38.2351
18JB01	R6569.9	-65.6	-62.5	Bastias et al. (2021a)	U-Pb zircon	LA-ICP-MS	163.53	0.53	0.84		-2.63892	18.9692	15.6702	38.6829
18JB04	R.6871.3	-75.1889	-71.4217	Bastias et al. (2021a)	U-Pb zircon	LA-ICP-MS	178.76	0.52	0.94	0.719975	-7.72574	18.5291	15.6332	38.4152
18JB05	R6607.1	-65.5333	-62.4333	Bastias et al. (2021a)	U-Pb zircon	LA-ICP-MS	161.57	0.47	1.03	0.708096	-3.70335	18.696	15.66	38.5424
18JB07	R6602.3	-65.5333	-62.2	Bastias et al. (2021a)	U-Pb zircon	LA-ICP-MS	164.47	0.39	0.9	0.708897	-8.61997	18.4519	15.6454	38.4964
18JB26	R5957.3	-70.6971	-67.568	Bastias et al. (2021a)	U-Pb zircon	LA-ICP-MS	156.05	0.27	1.17	0.70423	3.4266	18.4762	15.6182	38.3081
18JB32	R5257.5	-70.0333	-67.65	Bastias et al. (2021a)	U-Pb zircon	LA-ICP-MS	183.06	0.27	1.08	0.712482	-0.275246	18.6886	15.6635	38.5732
18JB50	R.6307.1	-71.5829	-66.8927	Bastias et al. (2021a)	U-Pb zircon	LA-ICP-MS	153.24	0.21	1.3	0.707866	-3.49051	18.6359	15.6475	38.5133
18JB52	R6851.1	-65.4025	-62.6958	Bastias et al. (2021a)	U-Pb zircon	LA-ICP-MS	160.61	0.14	1.18	0.708174	-3.64467	18.68	15.6624	38.5681
N14.035				Burton-Johnson et al. in prep.	U-Pb zircon	SIMS	117.4	1.9	0.0017
N14.040				Burton-Johnson et al. in prep.	U-Pb zircon	SIMS	109.4	0.8	1.6
N14.057				Burton-Johnson et al. in prep.	U-Pb zircon	SIMS	116.7	0.8	0.51
N14.137				Burton-Johnson et al. in prep.	U-Pb zircon	SIMS	113.1	0.7	1.5
N14.160				Burton-Johnson et al. in prep.	U-Pb zircon	SIMS	113.5	0.7	1.6
N14.198				Burton-Johnson et al. in prep.	U-Pb zircon	SIMS	112.8	0.7	1.17
N14.215				Burton-Johnson et al. in prep.	U-Pb zircon	SIMS	107.1	0.7	1.3
N14.242				Burton-Johnson et al. in prep.	U-Pb zircon	SIMS	109.3	0.7	0.87
N14.250				Burton-Johnson et al. in prep.	U-Pb zircon	SIMS	117	0.8	0.017
N14.265				Burton-Johnson et al. in prep.	U-Pb zircon	SIMS	113.4	0.8	1.4
N15.026				Burton-Johnson et al. in prep.	U-Pb zircon	SIMS	113.5	1.9	2.1
N15.028				Burton-Johnson et al. in prep.	U-Pb zircon	SIMS	112.2	0.8	1.2
N15.033				Burton-Johnson et al. in prep.	U-Pb zircon	SIMS	117.6	0.8	1.3
N15.066				Burton-Johnson et al. in prep.	U-Pb zircon	SIMS	113.8	0.8	1.5
N15.079				Burton-Johnson et al. in prep.	U-Pb zircon	SIMS	112.9	0.9	1.05
N15.096				Burton-Johnson et al. in prep.	U-Pb zircon	SIMS	95.7	0.7	1.6
N15.128				Burton-Johnson et al. in prep.	U-Pb zircon	SIMS	117.8	0.8	0.6
N15.135				Burton-Johnson et al. in prep.	U-Pb zircon	SIMS	118.2	0.8	1.03
N15.139				Burton-Johnson et al. in prep.	U-Pb zircon	SIMS	117.8	0.9	0.72
P14.041				Burton-Johnson et al. in prep.	U-Pb zircon	SIMS	100.6	0.7	1.3
P14.087				Burton-Johnson et al. in prep.	U-Pb zircon	SIMS	110	0.8	1.4
P14.157				Burton-Johnson et al. in prep.	U-Pb zircon	SIMS	103.3	0.7	0.9
325c3				Haase et al. (2012)	Ar/Ar whole rock		109.19	0.46
P.1825.7				Haase et al. (2012)	Ar/Ar whole rock		82.08	0.44
P.376.1				Haase et al. (2012)	Ar/Ar whole rock		102.4	1.3
P.466.1				Haase et al. (2012)	Ar/Ar whole rock		97.35	0.39
P.862.4				Haase et al. (2012)	Ar/Ar whole rock		135.17	2.57
R.5411.1				Leat et al. (2009)	Rb-Sr		81	2		0.711238
R.5411.4				Leat et al. (2009)	Rb-Sr		81	2		0.711089
R.5411.6				Leat et al. (2009)	Rb-Sr		81	2		0.711155	0.8
R.5414.3				Leat et al. (2009)	Field relationship		183	2.1		0.705618	1.9
R.5414.3				Leat et al. (2009)	Field relationship	-	183	6		0.705618	1.9
R.5414.4				Leat et al. (2009)	Field relationship		183	2.1		0.705113	1.3
R.5414.4				Leat et al. (2009)	Field relationship	-	183	6		0.705113	1.3
R.5414.5				Leat et al. (2009)	Field relationship		183	6		0.707825
R.5414.5				Leat et al. (2009)	Field relationship		183	2.1		0.707825
R.5414.6				Leat et al. (2009)	Field relationship		183	6		0.707313
R.5414.6				Leat et al. (2009)	Field relationship		183	2.1		0.707313
R.5414.7				Leat et al. (2009)	U-Pb zircon		183	6		0.707138	-2.9
R.5414.7				Leat et al. (2009)	U-Pb zircon		183	2.1		0.707138	-2.9
R.5505.1				Leat et al. (2009)	Rb-Sr		116	2		0.706105
R.5505.10				Leat et al. (2009)	Rb-Sr		116	2		0.706126
R.5505.11				Leat et al. (2009)	Rb-Sr		116	2		0.706261
R.5505.2				Leat et al. (2009)	Rb-Sr		116	2		0.706084
R.5505.3				Leat et al. (2009)	Rb-Sr		116	2		0.706122
R.5505.4				Leat et al. (2009)	Rb-Sr		116	2		0.706111	-1.8
R.5505.5				Leat et al. (2009)	Rb-Sr		116	2		0.707956
R.5505.6				Leat et al. (2009)	Rb-Sr		116	2		0.706133
R.5505.7				Leat et al. (2009)	Rb-Sr		116	2		0.706117
R.5505.8				Leat et al. (2009)	Rb-Sr		116	2		0.706136
R.5505.9				Leat et al. (2009)	Rb-Sr		116	2		0.706155
R.5507.1				Leat et al. (2009)	Rb-Sr		132	9		0.706141
R.5507.2				Leat et al. (2009)	Rb-Sr		132	9		0.706085
R.5507.3				Leat et al. (2009)	Rb-Sr		132	9		0.706347
R.5507.4				Leat et al. (2009)	Rb-Sr		132	9		0.706105
R.5507.5				Leat et al. (2009)	Rb-Sr		132	9		0.706055
R.5551.1*				Leat et al. (2009)	Rb-Sr		96	2		0.705614
R.5552.1*				Leat et al. (2009)	Rb-Sr		96	2		0.70558	0
R.5565.1				Leat et al. (2009)	Rb-Sr		96	2		0.705613
R.5565.3				Leat et al. (2009)	Rb-Sr		96	2		0.706608
R.5567.1				Leat et al. (2009)	Rb-Sr		71	9		0.707274
R.5567.2				Leat et al. (2009)	Rb-Sr		71	9		0.707215
R.5568.1				Leat et al. (2009)	Rb-Sr		71	9		0.707246
R.5569.1				Leat et al. (2009)	Rb-Sr		71	9		0.707245
R.5594.1				Leat et al. (2009)	Rb-Sr		132	9		0.705639
R.5595.10				Leat et al. (2009)	Rb-Sr		132	9		0.883291
R.5595.9				Leat et al. (2009)	Rb-Sr		132	9		0.705683	-0.4
R.5860.1*				Leat et al. (2009)	Rb-Sr		132	9		0.705673	-0.5
R.5860.3				Leat et al. (2009)	Rb-Sr		132	9		0.705663
R.5862.2				Leat et al. (2009)	Rb-Sr		132	9		0.705675
BR.060.1				Pankhurst et al. (2000)	U-Pb zircon	SHRIMP	164.3	1.7
R.312.2				Pankhurst et al. (2000)	U-Pb zircon	SHRIMP	164.2	1.6
R.4182.10				Pankhurst et al. (2000)	U-Pb zircon	SHRIMP	184.2	2.5
R.4197.2				Pankhurst et al. (2000)	U-Pb zircon	SHRIMP	183.9	1.7
R.505.4				Pankhurst et al. (2000)	U-Pb zircon	SHRIMP	156	1.1
R.601.9				Pankhurst et al. (2000)	U-Pb zircon	SHRIMP	162.2	1.1
R.631.1				Pankhurst et al. (2000)	U-Pb zircon	SHRIMP	166.9	1.6
R.6619.4				Pankhurst et al. (2000)	U-Pb zircon	SHRIMP	172.6	1.8
R.6632.10				Pankhurst et al. (2000)	U-Pb zircon	SHRIMP	168.3	2.2
R.6906.3				Pankhurst et al. (2000)	U-Pb zircon	SHRIMP	168.5	1.7
R.6908.7				Pankhurst et al. (2000)	U-Pb zircon	SHRIMP	170	1.4
R.6914.6				Pankhurst et al. (2000)	U-Pb zircon	SHRIMP	171	1.1
R.6605.6				Riley et al. (2001)	Field relationship		168	0		0.70674	-3
R.6607.3				Riley et al. (2001)	Field relationship		168	0		0.70751	-2.4
R.6609.3				Riley et al. (2001)	Field relationship		168	0		0.70645	-2.6
R.6612.4				Riley et al. (2001)	Field relationship		168	0		0.70559	-2.3
R.6618.7				Riley et al. (2001)	Field relationship		168	0		0.70621	-2.2
R.6622.4				Riley et al. (2001)	Field relationship		168	0		0.70667	-2.5
R.6623.3				Riley et al. (2001)	Field relationship		168	0		0.70666	-2.6
R.6625.2				Riley et al. (2001)	Field relationship		168	0		0.70674	-3.3
R.6625.3				Riley et al. (2001)	Field relationship		168	0		0.70633	-2.8
R.6627.3				Riley et al. (2001)	Field relationship		168	0		0.7063	-2.2
R.6628.3				Riley et al. (2001)	Field relationship		168	0		0.70697	-3.3
R.6629.5				Riley et al. (2001)	Field relationship		168	0		0.70663	-3.3
R.6630.4				Riley et al. (2001)	Field relationship		168	0		0.70648	-3
R.6632.2				Riley et al. (2001)	Field relationship		168	0		0.70644	-2.8
R.6632.7				Riley et al. (2001)	Field relationship		168	0		0.70668	-3.4
R.6851.3				Riley et al. (2001)	Field relationship		168	0		0.70724	-3.5
R.6861.1				Riley et al. (2001)	Field relationship		168	0		0.70712	-3.4
R.6871.3				Riley et al. (2001)	Field relationship		185	0		0.71965	-7.7
R.6874.1				Riley et al. (2001)	Field relationship		185	0		0.71829	-7.4
R.6888.2				Riley et al. (2001)	Field relationship		185	0		0.72056	-7.5
R.6889.2				Riley et al. (2001)	Field relationship		185	0		0.71866	-7.5
R.6892.1				Riley et al. (2001)	Field relationship		185	0		0.71062	-2.4
R.6893.1				Riley et al. (2001)	Field relationship		185	0		0.72021	-7.7
R.7102.1				Riley et al. (2001)	Field relationship		185	0		0.7156	-4.9
R.7103.1				Riley et al. (2001)	Field relationship		185	0		0.71885	-6.9
R.7108.2				Riley et al. (2001)	Field relationship		185	0		0.71799	-7.6
R.7111.1				Riley et al. (2001)	Field relationship		185	0		0.72057	-7.8
H9.520.1				Riley et al. (2012a)	U-Pb zircon	NORDSIM	185	3
H9.520.2				Riley et al. (2012a)	U-Pb zircon	NORDSIM	185	3
H9.545.1				Riley et al. (2012a)	U-Pb zircon	NORDSIM	173	3
H9.546.1				Riley et al. (2012a)	U-Pb zircon	NORDSIM	177	3
R.8137C				Riley et al. (2012a)	U-Pb zircon	NORDSIM	184	3
J6.347.1				Riley et al. (2012b)	U-Pb zircon	NORDISM	149.5	1.6
J8.20.1				Riley et al. (2012b)	U-Pb zircon	NORDISM	67.6	0.7
J8.403.1				Riley et al. (2012b)	U-Pb zircon	NORDISM	113.9	1.2
BR.015.1				Riley et al. (2016)	U-Pb zircon	SHRIMP	183	1	1.1
N10.2.1				Riley et al. (2016)	U-Pb zircon	NORDISM	180.2	0.74
N10.395.2				Riley et al. (2016)	U-Pb zircon	NORDSIM	183	1	1.1
N10.470.1				Riley et al. (2016)	U-Pb zircon	NORDSIM	182	2	0.9
N10.7.1				Riley et al. (2016)	U-Pb zircon	NORDISM	177.61	0.95
N11.115.1				Riley et al. (2016)	U-Pb zircon	NORDSIM	182	1	1
R.2143.3				Riley et al. (2016)	U-Pb zircon	NORDSIM	188	1	1.9	0.706097	-3.5
R.6157.1				Riley et al. (2016)	U-Pb zircon	SHRIMP	184	2	1.6
R.6308.1				Riley et al. (2016)	U-Pb zircon	SHRIMP	184	2	1.6
R.7170.1				Riley et al. (2016)	U-Pb zircon	SHRIMP	183	3	1.1	0.705758	-4.5
N10.413.1				Riley et al. (2018)	U-Pb zircon	NORDISM	117.7	0.6	0.56
P14.103.1				Riley et al. (2018)	U-Pb zircon	NORDISM	106.5	1.4	0.09
P14.11.1				Riley et al. (2018)	U-Pb zircon	NORDISM	102.5	0.6	2.7
P14.138.1				Riley et al. (2018)	U-Pb zircon	NORDISM	103.9	1.4	1.3
P14.25.1				Riley et al. (2018)	U-Pb zircon	NORDISM	118.4	1.4	0.015
P14.3.1				Riley et al. (2018)	U-Pb zircon	NORDISM	117.1	1.3	1.2
P14.35.1				Riley et al. (2018)	U-Pb zircon	NORDISM	117.9	1.3	1.4
P14.46.1				Riley et al. (2018)	U-Pb zircon	NORDISM	119.1	1.3	1.4
R.7180.1				Riley et al. (2018)	U-Pb zircon	NORDISM	129.7	0.8	2.1
R.7183.2				Riley et al. (2018)	U-Pb zircon	NORDISM	127.1	0.7	2.7
R.7614.1				Riley et al. (2018)	U-Pb zircon	NORDISM	115.9	0.7	0.05
R.7629.1				Riley et al. (2018)	U-Pb zircon	NORDISM	126.5	0.7	0.02
R.8264.1				Riley et al. (2018)	U-Pb zircon	NORDISM	113.4	0.8	0.005
R.8266A.1				Riley et al. (2018)	U-Pb zircon	NORDISM	112.6	0.6	0.12
0.999.3				Ryan, 2007	Field relationship		93	0		0.704449	2.6
CBA01				Ryan, 2007	Field relationship		93	0		0.704712	2.1
CHA01				Ryan, 2007	U-Pb zircon	LA-ICP-MS	93.22	0.71	2.5
CHA01				Ryan, 2007	Field relationship		93	0		0.704829	2.3
CHA08				Ryan, 2007	Field relationship		93	0		0.704991	2.1
O.935				Ryan, 2007	U-Pb zircon	Ar/Ar	89.97	0.98	2.2	0.704685	2.2
O.989.1				Ryan, 2007	Field relationship		93	0		0.70439	2
O.996.1				Ryan, 2007	Field relationship		93	0		0.704807	1.8
O.999.3				Ryan, 2007	Field relationship		93	0		0.704745	1.8
R.4056.1				Ryan, 2007	U-Pb zircon	LA-ICP-MS	89.41	0.59	0.55	0.704513	2.3
R.4056.6				Ryan, 2007	Field relationship		93	0		0.704793	1.6
R5.11				Ryan, 2007	U-Pb zircon	LA-ICP-MS	92.39	0.75	2.2	0.704605	2.5
